# Supplementary material for: Cardiac progenitor cell-derived extracellular vesicles promote angiogenesis through both associated- and co-isolated proteins
Source: PubMed Central journal article supplement (PMC10393955; doi:10.1038/s42003-023-05165-7), 2023-08-01
Supplement: 42003_2023_5165_MOESM1_ESM.pdf [file 42003_2023_5165_MOESM1_ESM.pdf]

## Supplementary Information

**Title: Cardiac progenitor cell-derived extracellular vesicles promote angiogenesis through both associated- and co-isolated proteins**

Marieke Theodora Roefs<sup>1</sup>, Julia Bauzá-Martinez<sup>2,\*</sup>, Simonides Immanuel van de Wakker<sup>1,\*</sup>, Jiabin Qin<sup>1</sup>, Willem Theodoor Olijve<sup>1</sup>, Robin Tuinte<sup>1</sup>, Marjolein Rozeboom<sup>1</sup>, Christian Snijders Blok<sup>1</sup>, Emma Alise Mol<sup>1</sup>, Wei Wu<sup>2,3,\*</sup>, Pieter Vader<sup>1,4,\*</sup>, Joost Petrus Gerardus Sluijter<sup>1,\*</sup>

[1] Department of Experimental Cardiology, University Medical Center Utrecht, Utrecht University, The Netherlands.

[2] Biomolecular Mass Spectrometry and Proteomics, Bijvoet Center for Biomolecular Research and Utrecht Institute for Pharmaceutical Sciences, Utrecht University, Utrecht, The Netherlands.

[3] Singapore Immunology Network (SIgN), ASTAR (Agency for Science, Technology and Research), Singapore, Singapore.

[4] CDL Research, University Medical Center Utrecht, The Netherlands.

## Supplementary Table 1

Sequences of all guide RNAs for each CRISPR

|                |                            | <i>Genomic target region</i> |
|----------------|----------------------------|------------------------------|
| PAPP-A gRNA 1  | 5'-AGGAGTAGCAACTTGGCCAT-3' | exon 3                       |
| PAPP-A gRNA 2  | 5'-AGTTGGCAGGAGTAGCAACT-3' | exon 3                       |
| PAPPA-A gRNA 3 | 5'-GGCCTCTATCACGTCTTCCG-3' | exon 4                       |
| NID1 gRNA 1    | 5'-GGGTTTGCGGGACCGCAGTT-3' | 5'UTR/exon1                  |
| NID1 gRNA 2    | 5'-GAACTGCGGTCCCGCAAACC-3' | 5'UTR                        |
| NID1 gRNA 3    | 5'-TGTCGGATCTGTCGTAGAAG-3' | exon1                        |
| Non targeting  | 5'-ATTTCCCTACGGAGATATCC-3' |                              |

Primer sequences of genomic DNA amplification for T7 endonuclease assay

|                |                                 |
|----------------|---------------------------------|
| PAPP-A exon 3  | F: 5'-GCCTGTTATCTTTTTGGGGGC-3'  |
|                | R: 5'-CTGTGCCAGTACAGTGTGGT-3'   |
| PAPPA-A exon 4 | F: 5'-GCTCTCAGGGCAATGGAGTC-3'   |
|                | R: 5'-AACCCAGAAAGAGAATGACCGA-3' |
| NID1 exon 1    | F: 5'-AACAAGTTGACAGCGACCCC-3'   |
|                | R: 5'-CCGGTTACATCCCCGCCTTC-3'   |

## Supplementary Table 2

Top-20 proteins (of n=105) enriched in veh-EVs compared with Ca ion-EVs and SKOV-3-EVs. Ranked by the mean protein abundance (log2) in veh-EVs, the top 20 significantly enriched (q-value of Student's T-test) proteins are displayed.

| <b>Gene name</b> | <b>Mean veh-EVs</b> | <b>Mean Calon-EVs</b> | <b>Mean SKOV-3-EVs</b> | <b>q-value (Student's T-test) veh-EVs vs. Calon-EVs</b> | <b>q-value (Student's T-test) veh-EVs vs. SKOV-3-EVs</b> |
|------------------|---------------------|-----------------------|------------------------|---------------------------------------------------------|----------------------------------------------------------|
| <b>COL1A1</b>    | 31.2                | 23.7                  | 19.2                   | 0.0228                                                  | 0.0056                                                   |
| <b>COL6A3</b>    | 30.9                | 24.9                  | 19.4                   | 0.0013                                                  | 0.0045                                                   |
| <b>FN1</b>       | 29.9                | 26.6                  | 26.5                   | 0.0171                                                  | 0.0059                                                   |
| <b>LAMA4</b>     | 29.5                | 23.3                  | 19.7                   | 0.0053                                                  | 0.0000                                                   |
| <b>LAMC1</b>     | 29.4                | 24.8                  | 27.1                   | 0.0000                                                  | 0.0032                                                   |
| <b>COL1A2</b>    | 29.3                | 22.0                  | 19.8                   | 0.0241                                                  | 0.0060                                                   |
| <b>APP</b>       | 29.3                | 22.1                  | 21.8                   | 0.0009                                                  | 0.0054                                                   |
| <b>UBA52</b>     | 29.1                | 27.4                  | 27.7                   | 0.0122                                                  | 0.0249                                                   |
| <b>VCAN</b>      | 29.0                | 25.2                  | 18.9                   | 0.0050                                                  | 0.0055                                                   |
| <b>EDIL3</b>     | 29.0                | 24.3                  | 17.6                   | 0.0029                                                  | 0.0000                                                   |
| <b>LAMB1</b>     | 28.8                | 24.2                  | 26.5                   | 0.0000                                                  | 0.0030                                                   |
| <b>COL6A1</b>    | 28.8                | 23.9                  | 22.8                   | 0.0049                                                  | 0.0043                                                   |
| <b>SRGN</b>      | 28.2                | 18.3                  | 19.3                   | 0.0051                                                  | 0.0066                                                   |
| <b>COL6A2</b>    | 28.1                | 22.1                  | 18.6                   | 0.0047                                                  | 0.0000                                                   |
| <b>PAPPA</b>     | 28.1                | 21.5                  | 16.7                   | 0.0051                                                  | 0.0000                                                   |
| <b>ANPEP</b>     | 28.0                | 24.6                  | 17.8                   | 0.0118                                                  | 0.0000                                                   |
| <b>THBS1</b>     | 27.9                | 23.9                  | 26.4                   | 0.0030                                                  | 0.0200                                                   |
| <b>NID1</b>      | 27.8                | 19.2                  | 19.7                   | 0.0000                                                  | 0.0049                                                   |
| <b>BASP1</b>     | 27.7                | 25.5                  | 23.7                   | 0.0050                                                  | 0.0057                                                   |
| <b>ITGB1</b>     | 27.6                | 25.4                  | 26.3                   | 0.0175                                                  | 0.0068                                                   |

## Supplementary Figures

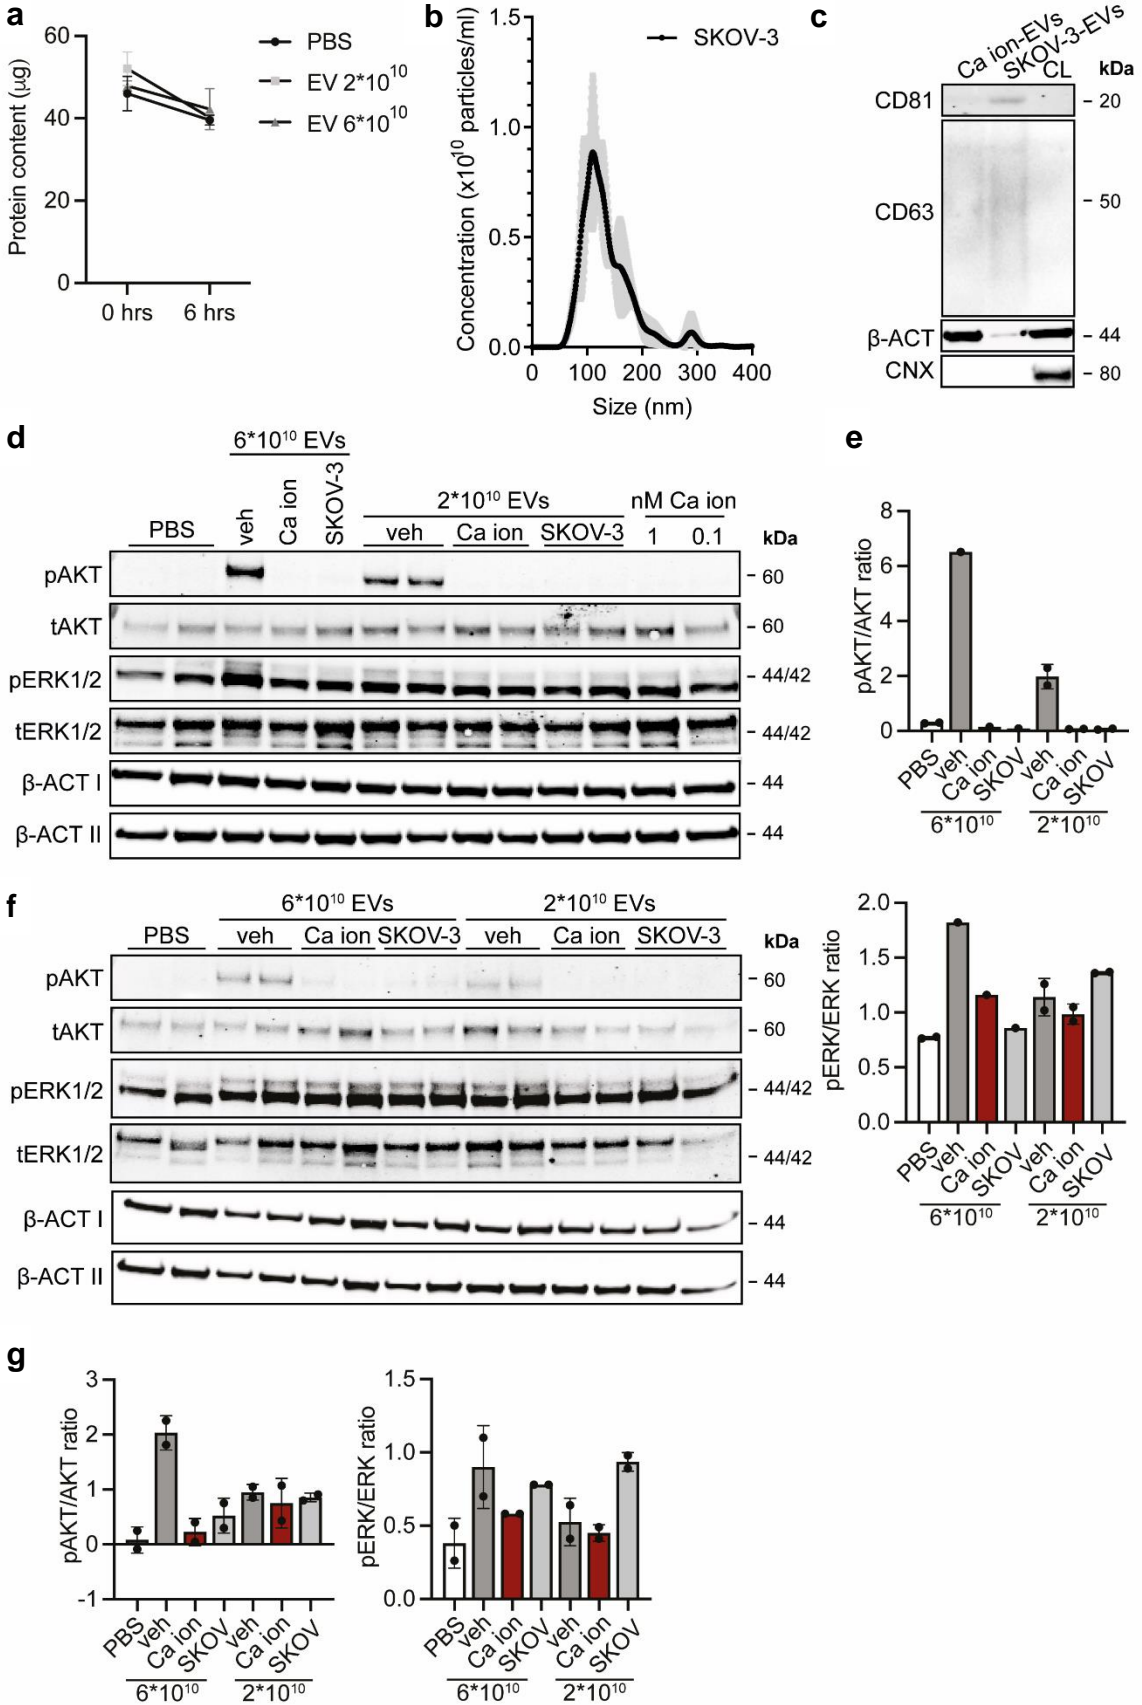

**Supplementary Figure 1. SKOV-3 EVs do not activate intracellular signaling in HMEC-1.** (a) Total protein content of HMEC-1 lysates collected 0 or 6 hrs after stimulation with PBS,  $2 \times 10^{10}$  or  $6 \times 10^{10}$  EVs. Data are displayed as mean  $\pm$ SD (n=3). (b) Representative NTA plot showing the size distribution and particle concentration of SKOV-3-EVs. (c) Western blot analysis showing the presence of CD81, CD63,  $\beta$ -actin ( $\beta$ -ACT), and absence of Calnexin (CNX) in Ca ion-EVs and SKOV-3-EVs.  $\beta$ -ACT and CNX were present in Ca ion-CPC lysate (CL). (d, e) Representative western blot analysis of phosphorylated AKT (pAKT), total AKT (tAKT), phosphorylated ERK1/2 (pERK1/2) and total ERK1/2 (tERK1/2) in HMEC-1 treated with veh-, Ca ion- and SKOV-3-EVs normalized on two doses of EV particle numbers, and with 1 nM and 0.1 nM calcium ionophore A23187 in PBS.  $\beta$ -ACT was included as housekeeping protein. (e) Quantification of pAKT, tAKT, pERK1/2 and tERK1/2 expression levels using densitometry expressed as pAKT/AKT and pERK/ERK ratios. (f, g) Biological replicate of (d) and (e). Data are presented as mean  $\pm$  SD.

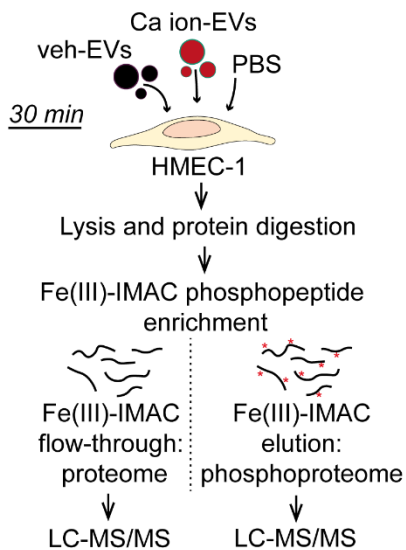

**Supplementary Figure 2. Workflow used for phosphoproteomic analysis.** Schematic of workflow used for phosphoproteomic analysis by liquid chromatography-mass spectrometry (LC-MS/MS). EV stimulated HMEC-1 were lysed and extracted proteins were digested into peptides and loaded into Fe(III)-Immobilized Metal Affinity Chromatography (Fe(III)-IMAC) cartridges for phosphopeptide enrichment. Fe(III)-IMAC flow-through containing the non-phosphorylated subset of proteome, and elutions containing the phosphorylated subset of the proteome were analysed by (LC-MS/MS).

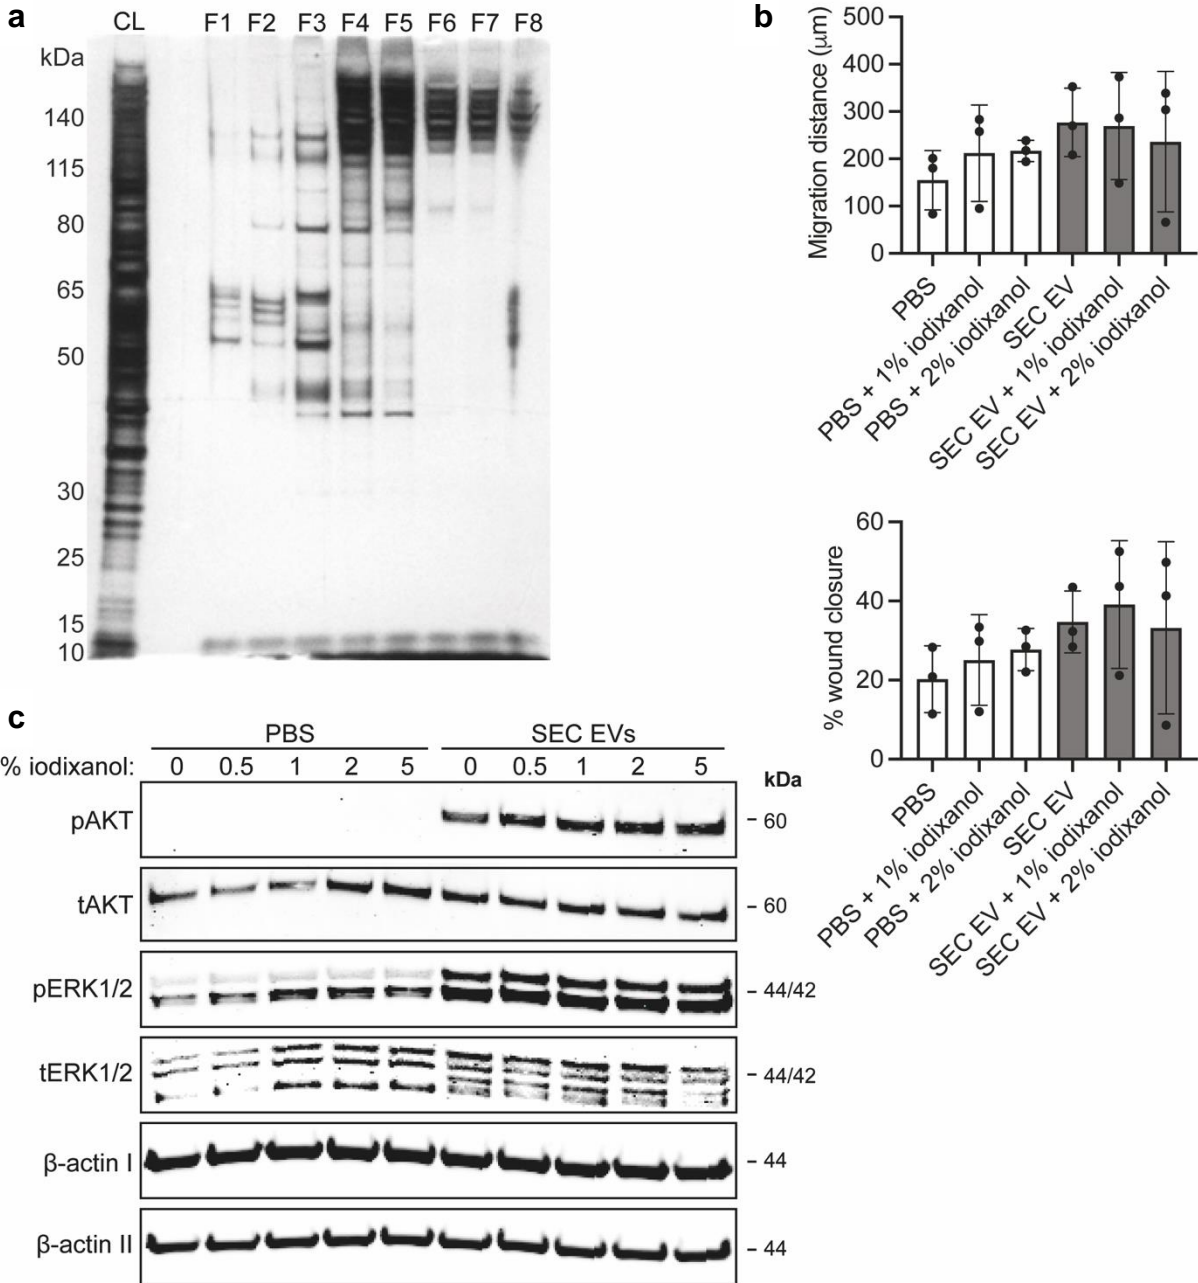

**Supplementary Figure 3. Influence of iodixanol concentration on EV-mediated HMEC-1 activation.**

(a) Silver stain of fractions (F1-8) collected after ultracentrifugation of SEC-EVs loaded in the bottom of a discontinuous Optiprep™ gradient. Equal volumes of each sample were analysed, and 1  $\mu\text{g}$  CPC lysate (CL) was included as control. (b) Representative wound healing assay showing effects of PBS and 1  $\mu\text{g}$  CPC-EVs simultaneous with different concentrations of iodixanol on HMEC-1 migration, analysed both as absolute migration distance (top) and % wound closure (bottom) (n=3, technical replicates. Data are

representative of three biologically independent experiments). Data are presented as mean  $\pm$  SD. (c) Representative western blot analysis of phosphorylated AKT (pAKT), total AKT (tAKT), phosphorylated ERK1/2 (pERK1/2) and total ERK1/2 (tERK1/2) in HMEC-1 treated with PBS and  $2 \times 10^{10}$  EVs. simultaneous with different concentrations of iodixanol (0-5%).  $\beta$ -ACT was included as housekeeping protein.



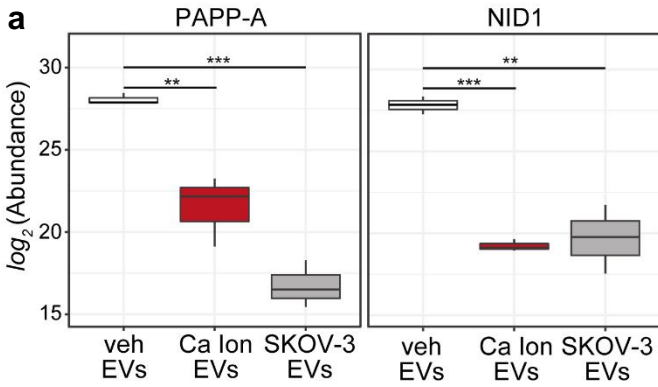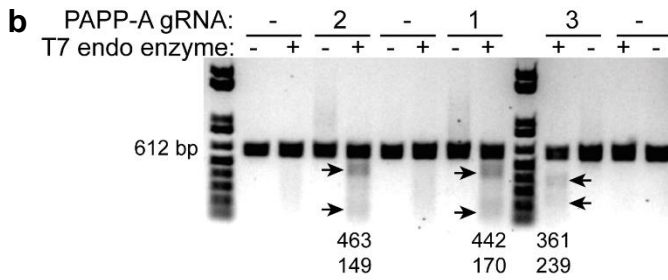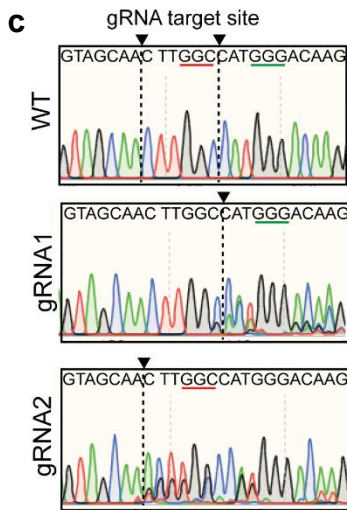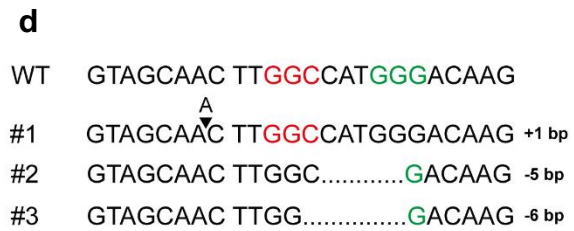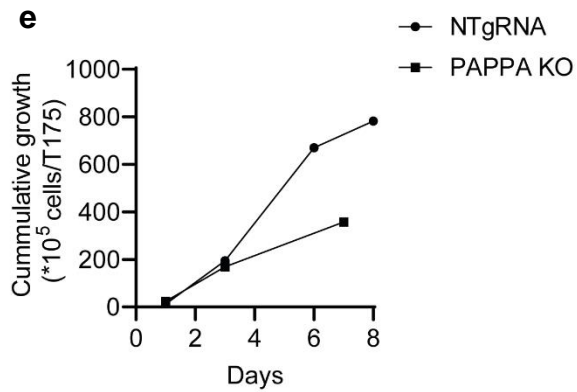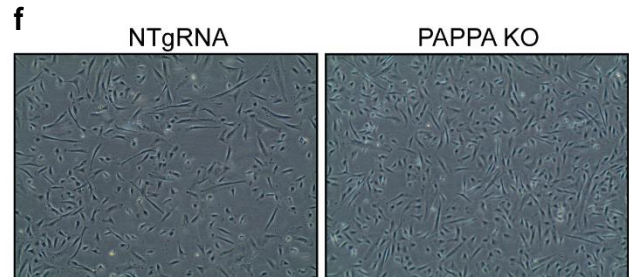

**Supplementary Figure 4. Generation of PAPPA knock-out CPC lines.** (a) Boxplots representing protein abundance ( $\log_2$ ) of PAPP-A and NID1 in veh-, Ca ion- and SKOV-3-EVs, as measured with by LC-MS/MS. Corrected P-values were calculated using student's T-test. \*\* =  $q < 0.01$ . \*\*\* =  $q < 0.001$ . Boxes represent the 25%, 50% (median) and 75% quartiles and whiskers represent the  $\pm 1.5$  interquartile range. (b) T7 endonuclease assay confirming a double-stranded break at the CRISPR/Cas9 target site in exon 3 of *PAPPA* in CPCs transduced with three different gRNAs (1-3). (c) Sanger sequencing results confirming frameshift in *PAPPA* exon 3 at the CRISPR/Cas9 target site of gRNA1 and gRNA2, compared with wild-type (WT) CPC genomic DNA. (d) Genomic DNA sequence surrounding two gRNA target sites in exon 3 of *PAPPA* of three individual PAPPA KO clones. Clones had homozygous mutations on both alleles. (e) Growth curves of NTgRNA- and PAPPA KO-CPC lines selected for functional studies, as visualized as cumulative cell growth. (f) Cell viability of PAPPA KO- and NTgRNA-CPC clones.

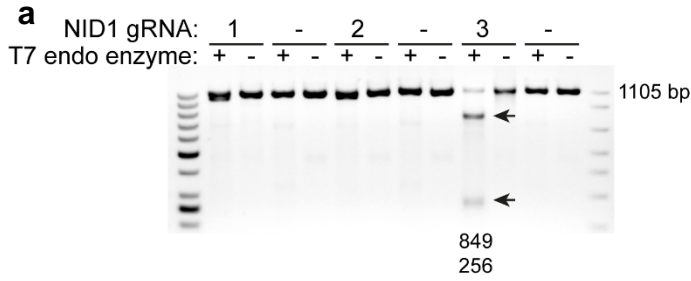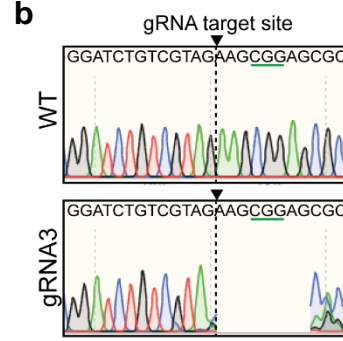

**c** WT GGATCTGTCGTAGAAGCGGAGCGC  
#1 GGATCTGTCGTAG.....CGC -8 bp  
#2 GGATCTGTCGTA...AAGCGGAGCGC -1 bp  
#3 GGATCTGTCGTAG.....CGGAGCGC -3 bp  
#4 GGATCTGTCGT.....CGGAGCGC -5 bp  
#5 GGATCTGTCGTAG..... -23 bp / -64 bp

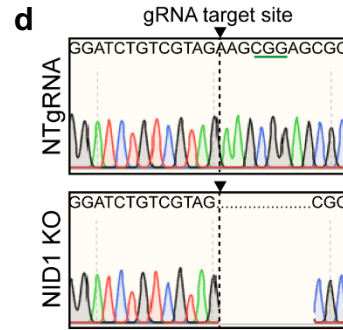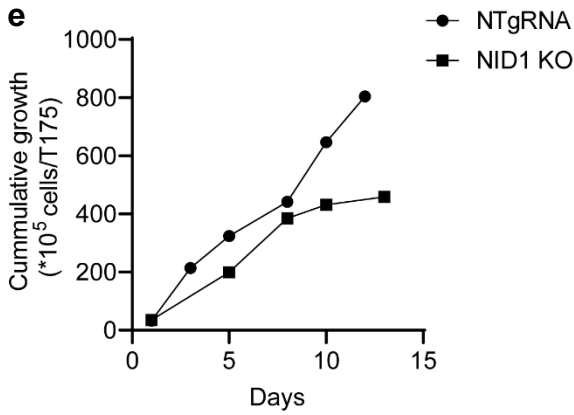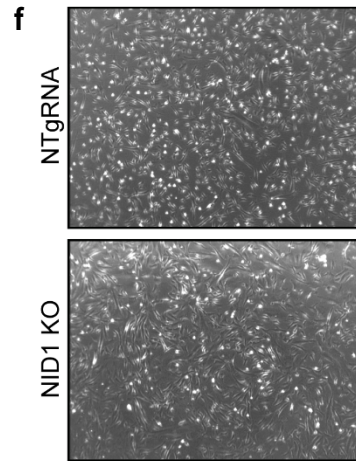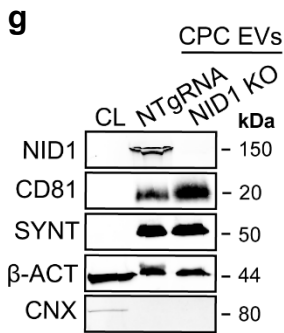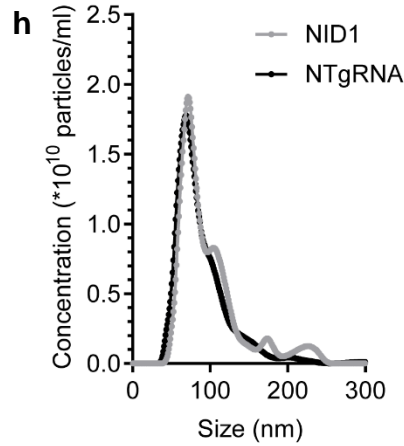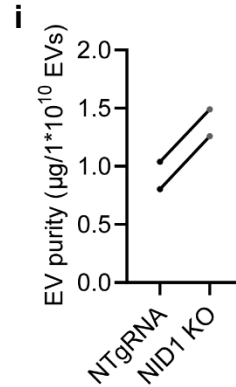

**Supplementary Figure 5. Generation of NID1 knock-out CPC lines.** (a) T7 endonuclease assay confirming a double-stranded break at the CRISPR/Cas9 target site in exon 1 of *NID1* in CPCs transduced with three different gRNAs (1-3). (b) Sanger sequencing results confirming frameshift in *NID1* exon 1 at the CRISPR/Cas9 target site of gRNA3, compared with wild-type (WT) CPC genomic DNA. (c) Genomic DNA sequence surrounding the gRNA3 target site in exon 1 of *NID1* of five individual NID1 KO clones. Clones had homozygous mutations on both alleles. (d) Sanger sequencing results confirming 8 bp deletion in exon 1 of *NID1* at the CRISPR/Cas9 target site of the NID1 KO-CPC clone, compared with the NTgRNA polyclonal CPC line. (e) Growth curves of NTgRNA- and NID1 KO-CPC lines selected for functional studies, as visualized as cumulative cell growth. (f) Cell viability of NID1 KO- and NTgRNA-CPC clones. (g) Western blot analysis showing the absence of NID1 in NID1 KO-EVs compared with NTgRNA-EVs; the presence of CD81, Syntenin-1 (SYNT),  $\beta$ -actin ( $\beta$ -ACT), and absence of Calnexin (CNX) in both EV populations.  $\beta$ -ACT and CNX were present in CPC lysate (CL). (h) Representative NTA plot showing the size distribution and particle concentration of NID1 KO- and NTgRNA-CPC-EVs. (i) Protein content per  $1 \times 10^{10}$  NID1 KO- and NTgRNA-EVs of two representative experiments.

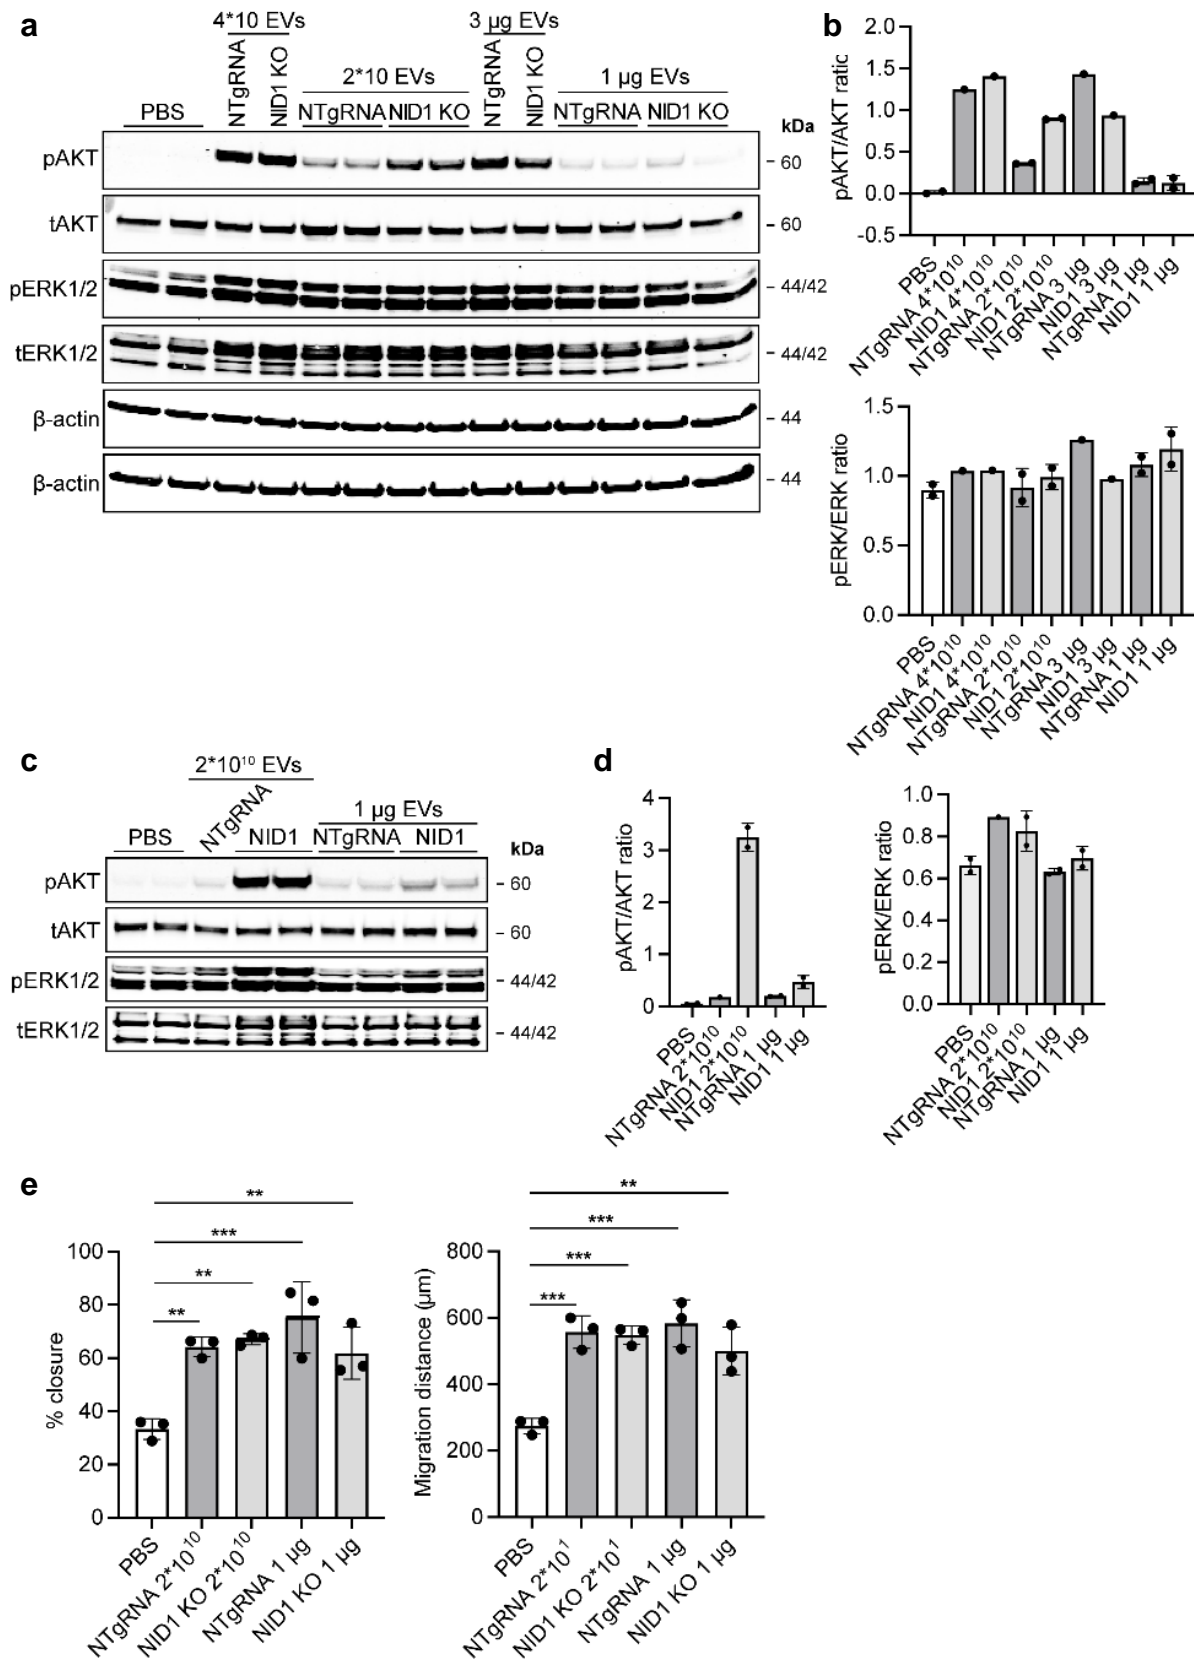

**Supplementary Figure 6. NID1 KO-EVs were as potent as NTgRNA-EVs in activating intracellular signalling in HMEC-1 and in inducing HMEC-1 migration.** (a) Representative western blot analysis of phosphorylated AKT (pAKT), total AKT (tAKT), phosphorylated ERK1/2 (pERK1/2) and total ERK1/2 (tERK1/2) in HMEC-1 treated with NID1 KO- and NTgRNA-EVs normalized on two doses of EV particle numbers or EV total protein content.  $\beta$ -actin ( $\beta$ -ACT) was included as housekeeping protein. (b) Quantification of pAKT, tAKT, pERK1/2 and tERK1/2 expression levels using densitometry expressed as pAKT/AKT and pERK/ERK ratios. (c, d) Biological replicate of (a) and (b). (e) Representative wound healing experiment showing effects of  $2 \times 10^{10}$  and 1  $\mu$ g NTgRNA- and NID1 KO-EVs on HMEC-1 migration, analysed both as % wound closure and absolute migration distance (n=3, technical replicates. Data are representative of biologically independent experiments). Data are presented as mean  $\pm$  SD. \*\*=  $p < 0.0021$ . \*\*\*=  $p < 0.0002$ .

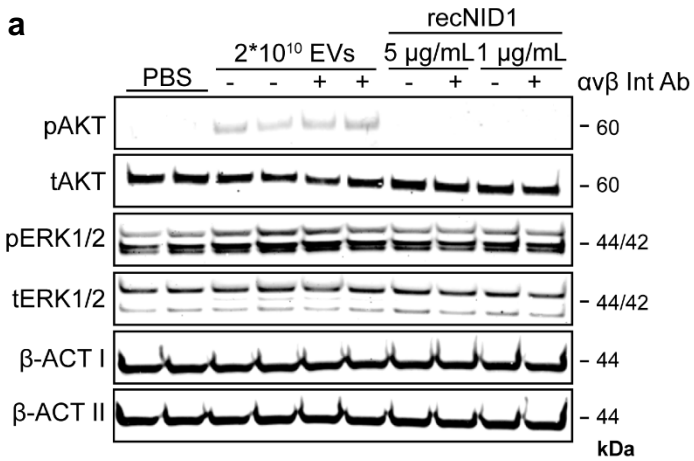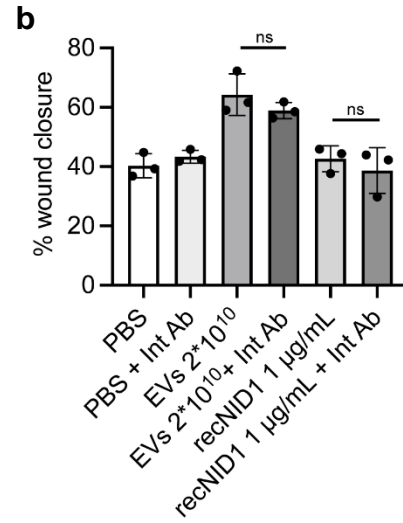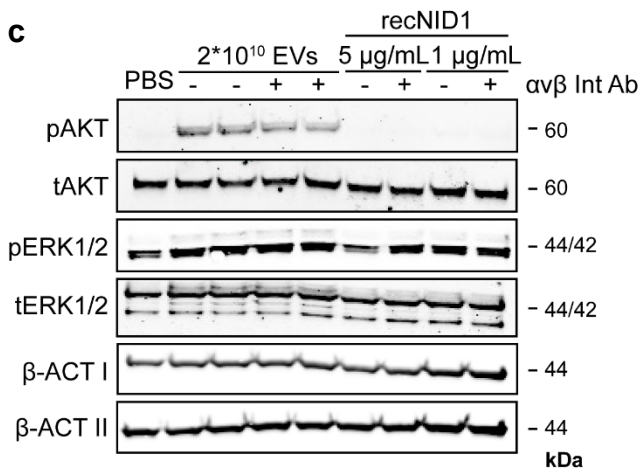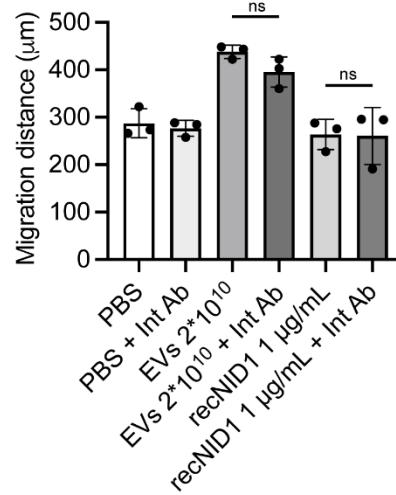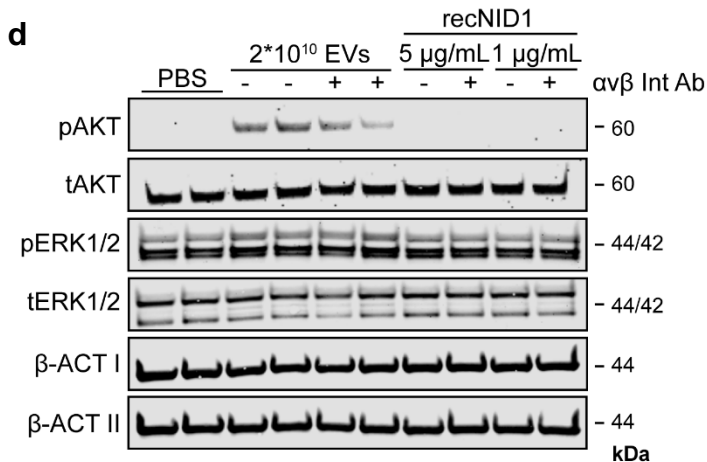

**Supplementary Figure 7. Influence of IntegrinαVβ3 blocking on HMEC-1 activation and migration.**

(a) Representative western blot analysis of phosphorylated AKT (pAKT), total AKT (tAKT), phosphorylated ERK1/2 (pERK1/2) and total ERK1/2 (tERK1/2) in HMEC-1 treated with 2x10<sup>10</sup> CPC-EVs, or with 5 μg/mL

or 1  $\mu\text{g}/\text{mL}$  recombinant IGF-1 after pre-incubation with (+) or without (-) 10  $\mu\text{g}/\text{mL}$  Integrin $\alpha\text{V}\beta\text{3}$  antibody.  $\beta$ -actin ( $\beta$ -ACT) was included as housekeeping protein. (b) Representative wound healing assay showing effects of 10  $\mu\text{g}/\text{mL}$  Integrin $\alpha\text{V}\beta\text{3}$  antibody addition to CPC-EV-induced HMEC-1 migration, analysed both as % wound closure and absolute migration distance. 5  $\mu\text{g}/\text{mL}$  and 1  $\mu\text{g}/\text{mL}$  recombinant NID1 (recNID1) were included as control (n=3, technical replicates. Data are representative of biologically independent experiments). (c, d) Biological replicates of (a). Data are presented as mean  $\pm$  SD. ns= not-significant.

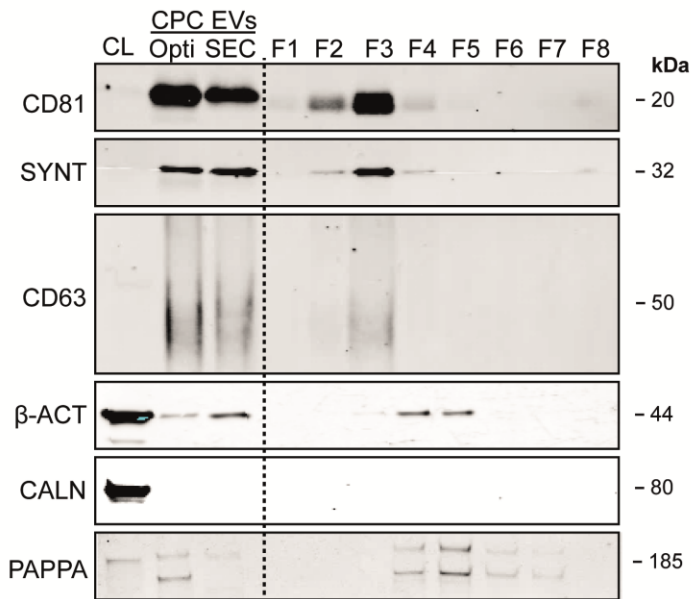

**Supplementary Figure 8. PAPP-A presence in iodixanol gradient fractions.**

SEC-EVs were separated in a discontinuous Optiprep<sup>TM</sup> gradient and resulting fractions (F1-8) were analysed for the presence of EV-marker proteins CD81, CD63, Syntenin-1 (SYNT),  $\beta$ -actin ( $\beta$ -ACT) and PAPP-A and absence of Calnexin (CALN) by western blotting. Equal volumes of each sample were analysed. Cell lysate (CL) and Opti-EVs, retrieved by pooling and concentration of fractions 1-5 using a 100 kDa cut-off spin filter, were included. CD81, CD63 and SYNT blots are also displayed in *Figure 8b*.



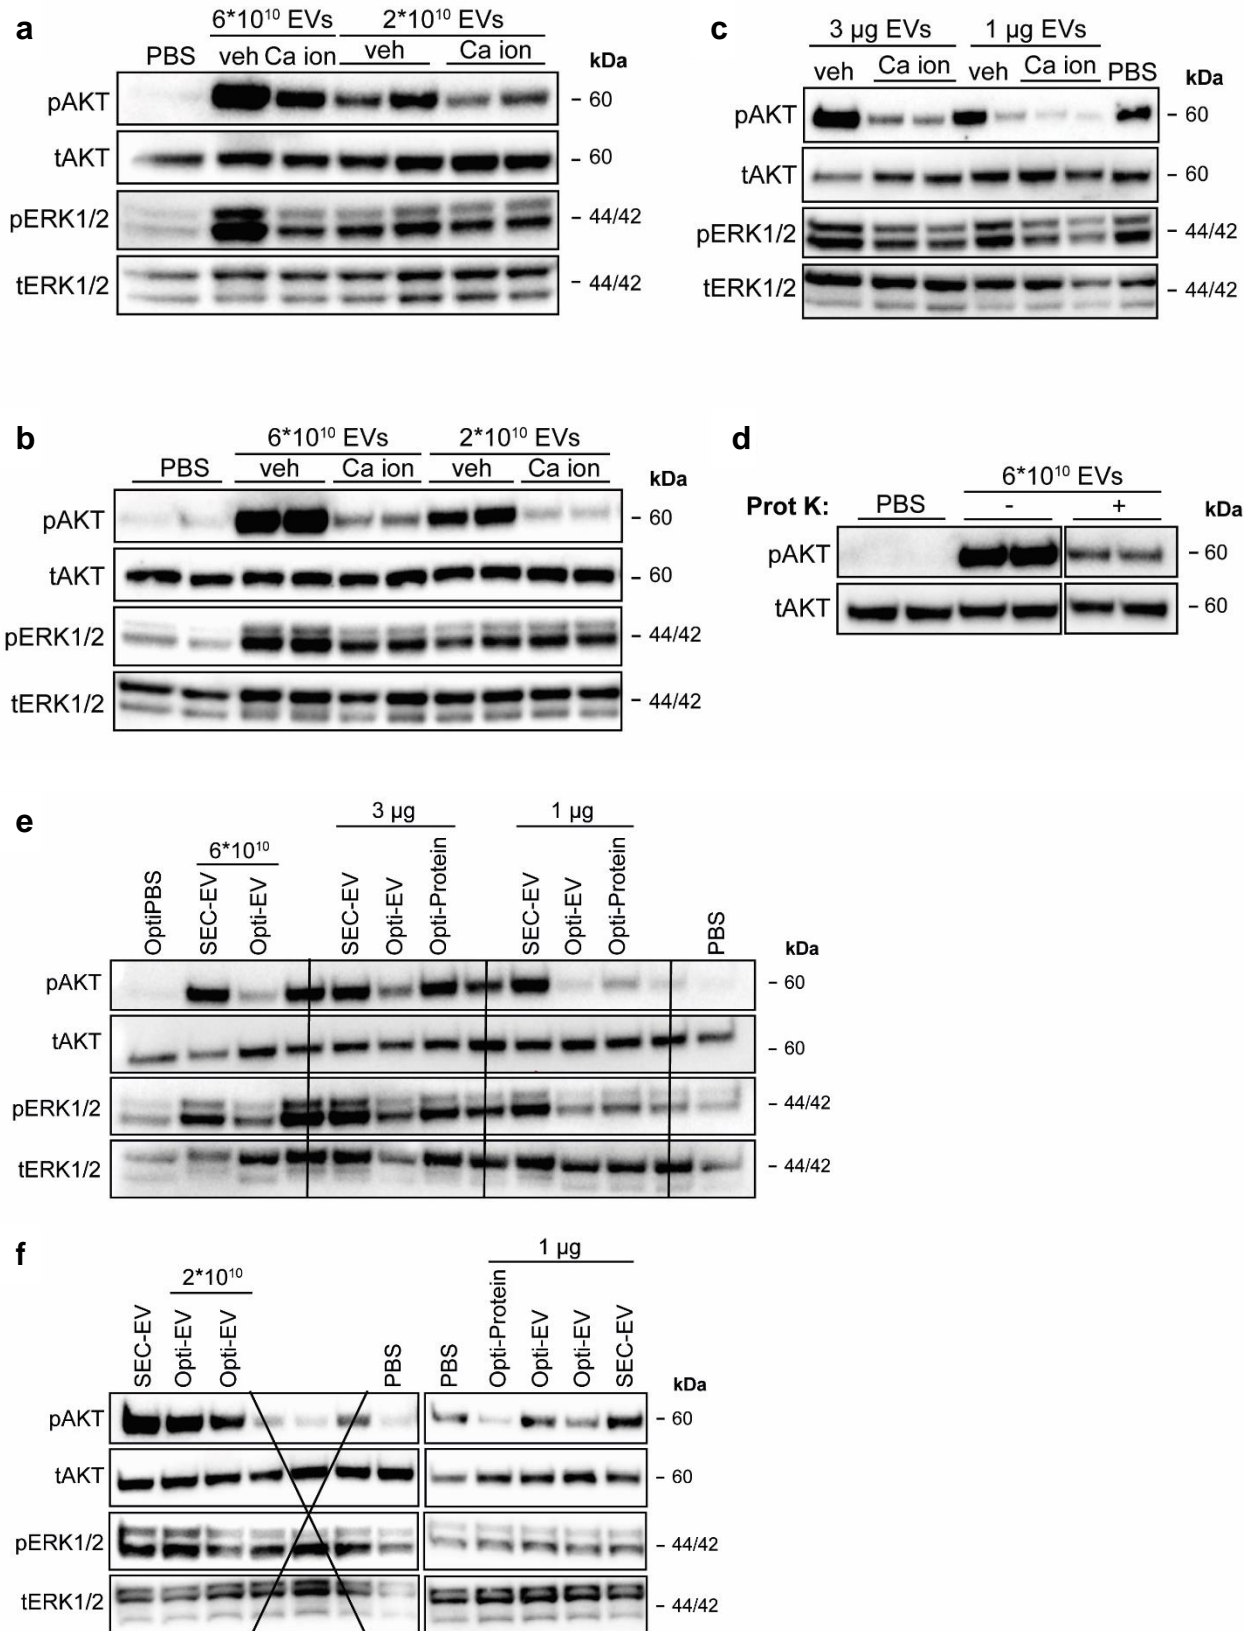

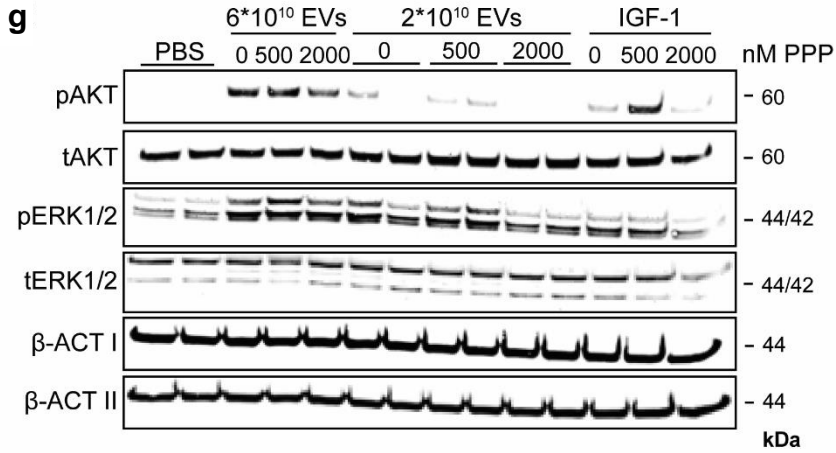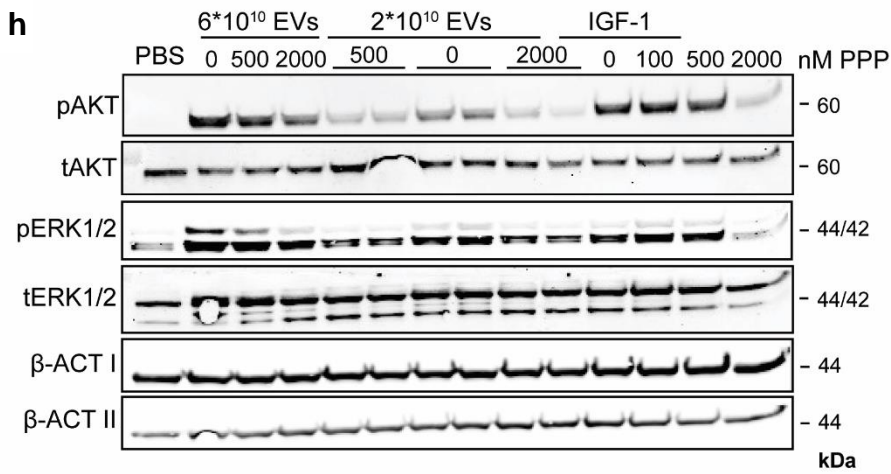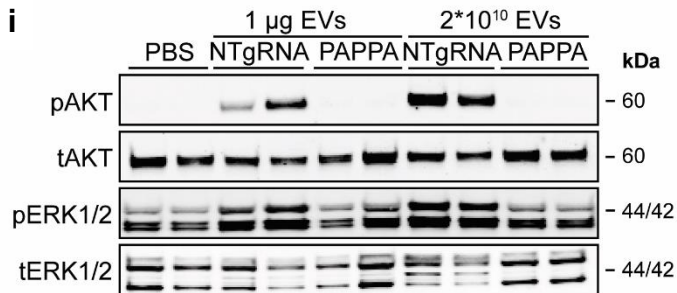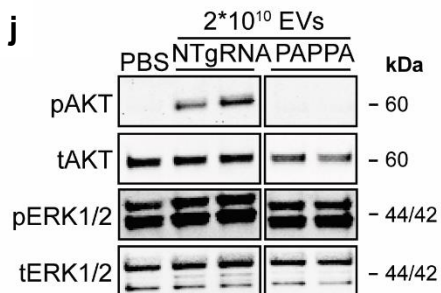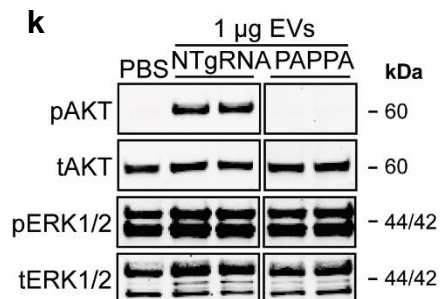

**Supplementary Figure 9. Biological replicates of western blot analysis and quantification of pAKT, AKT, pERK and ERK expression levels.** Biological replicates of Figure: (a, b) 2e; (c) 2g; (d) 4d; (e-f) 8g; (g, h) 6b; (i-k) 7a, c.

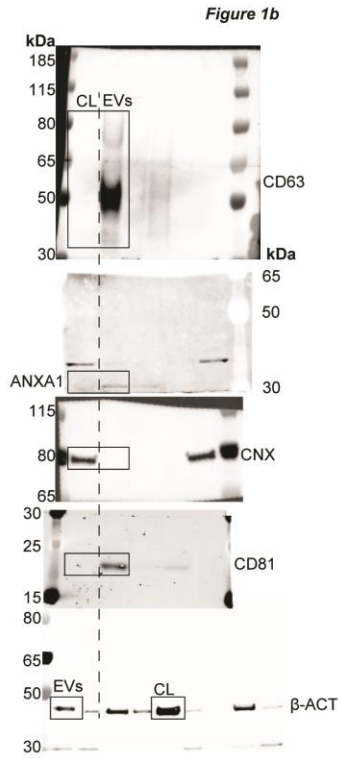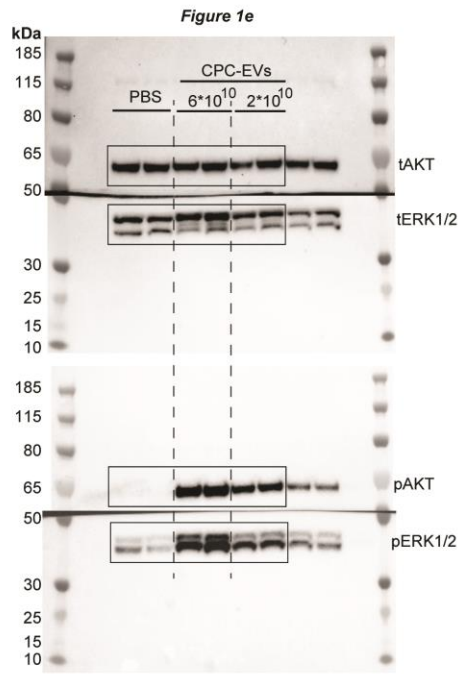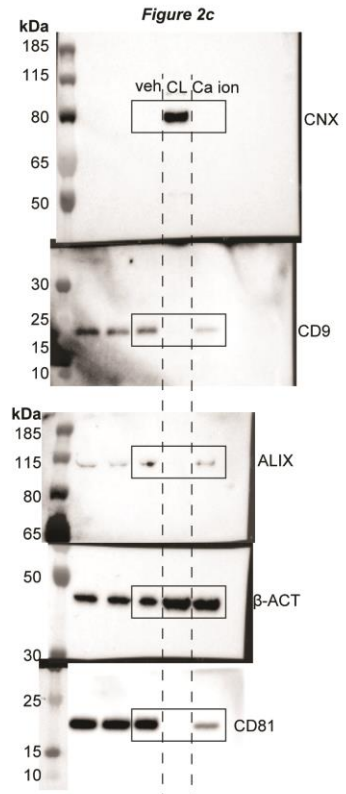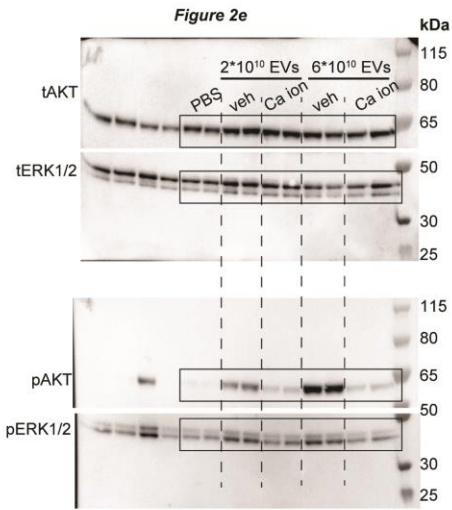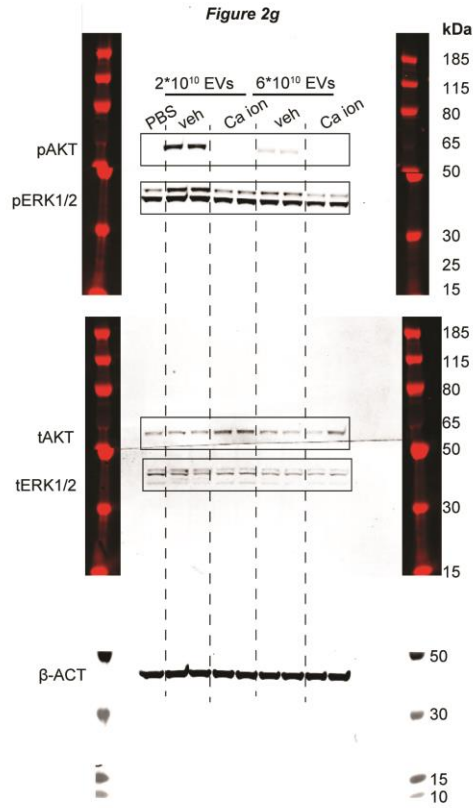

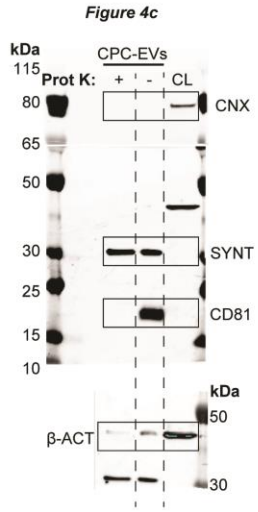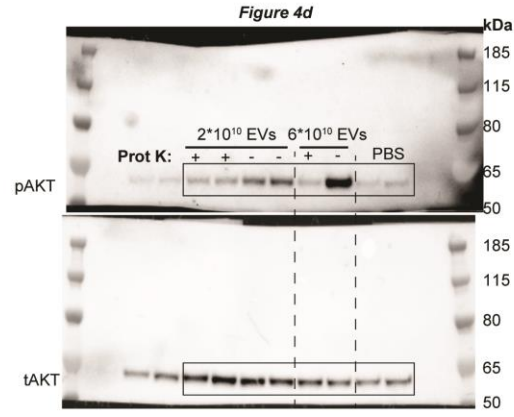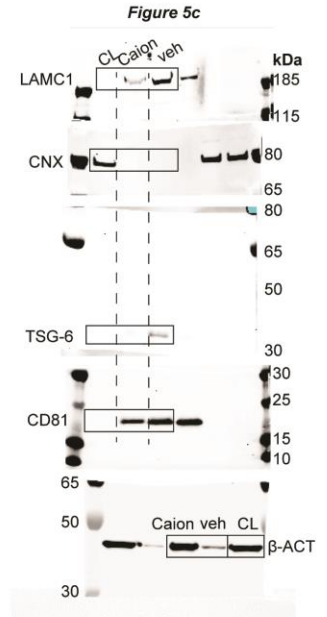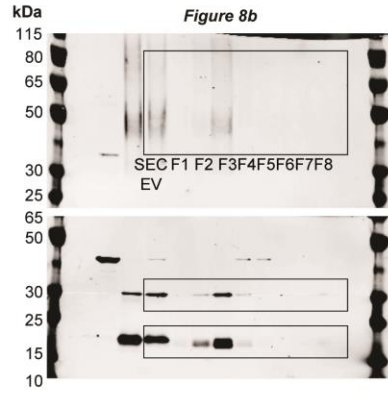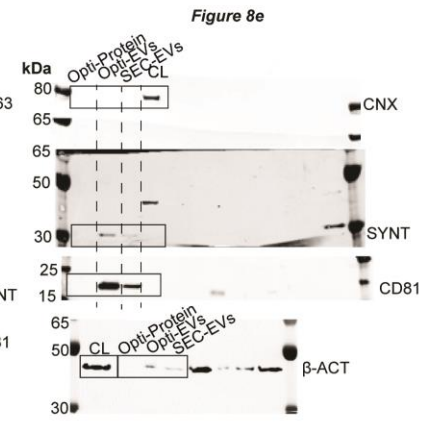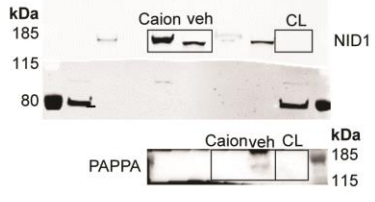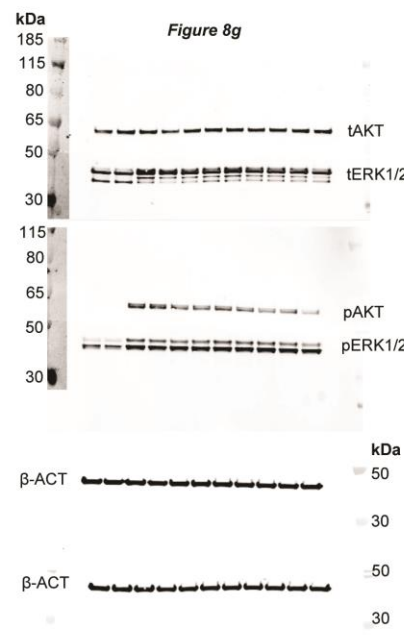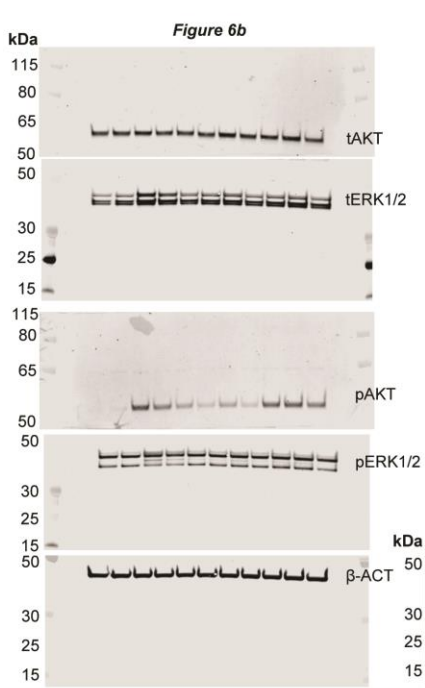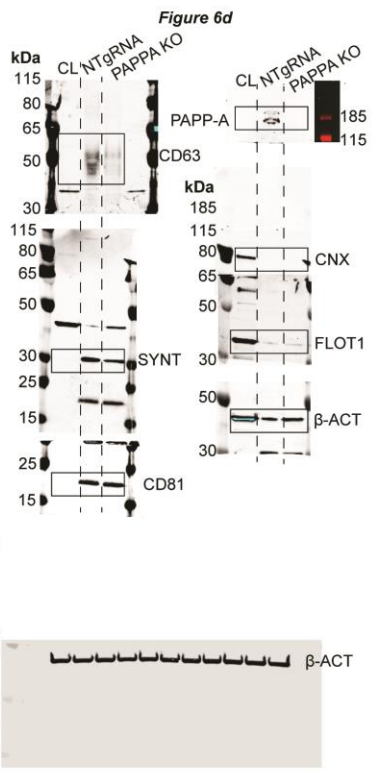

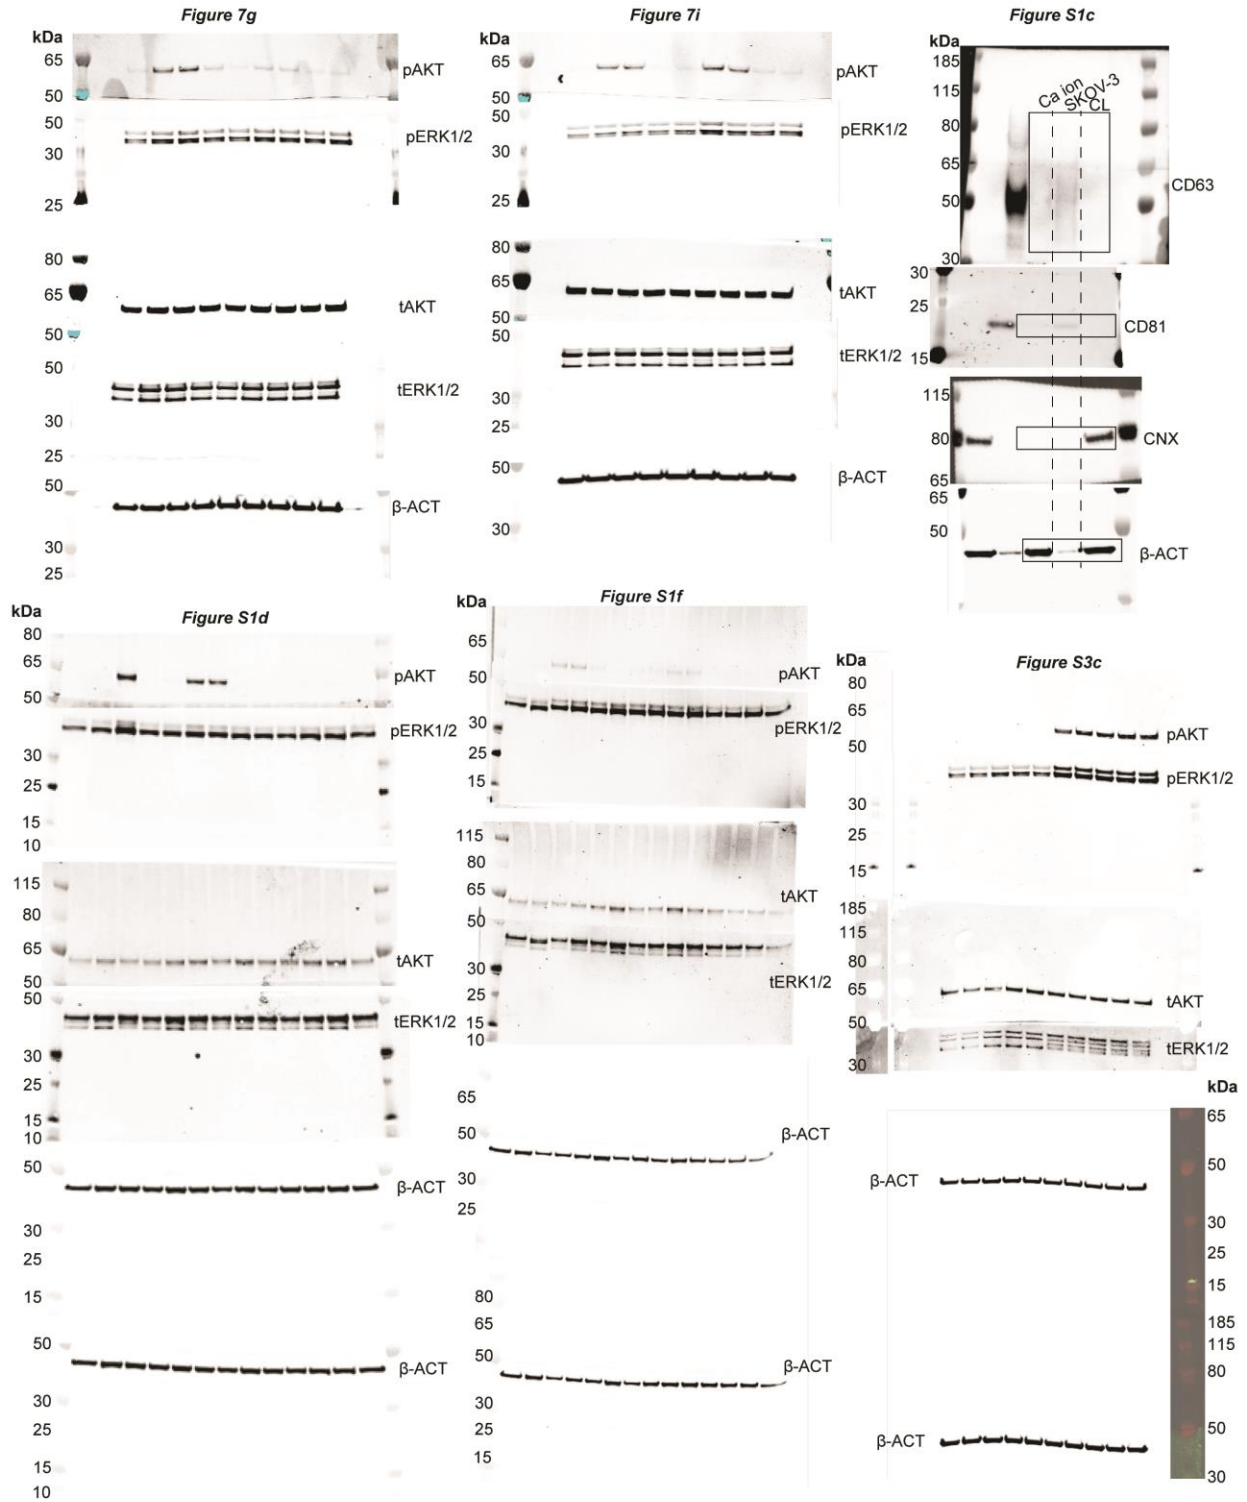

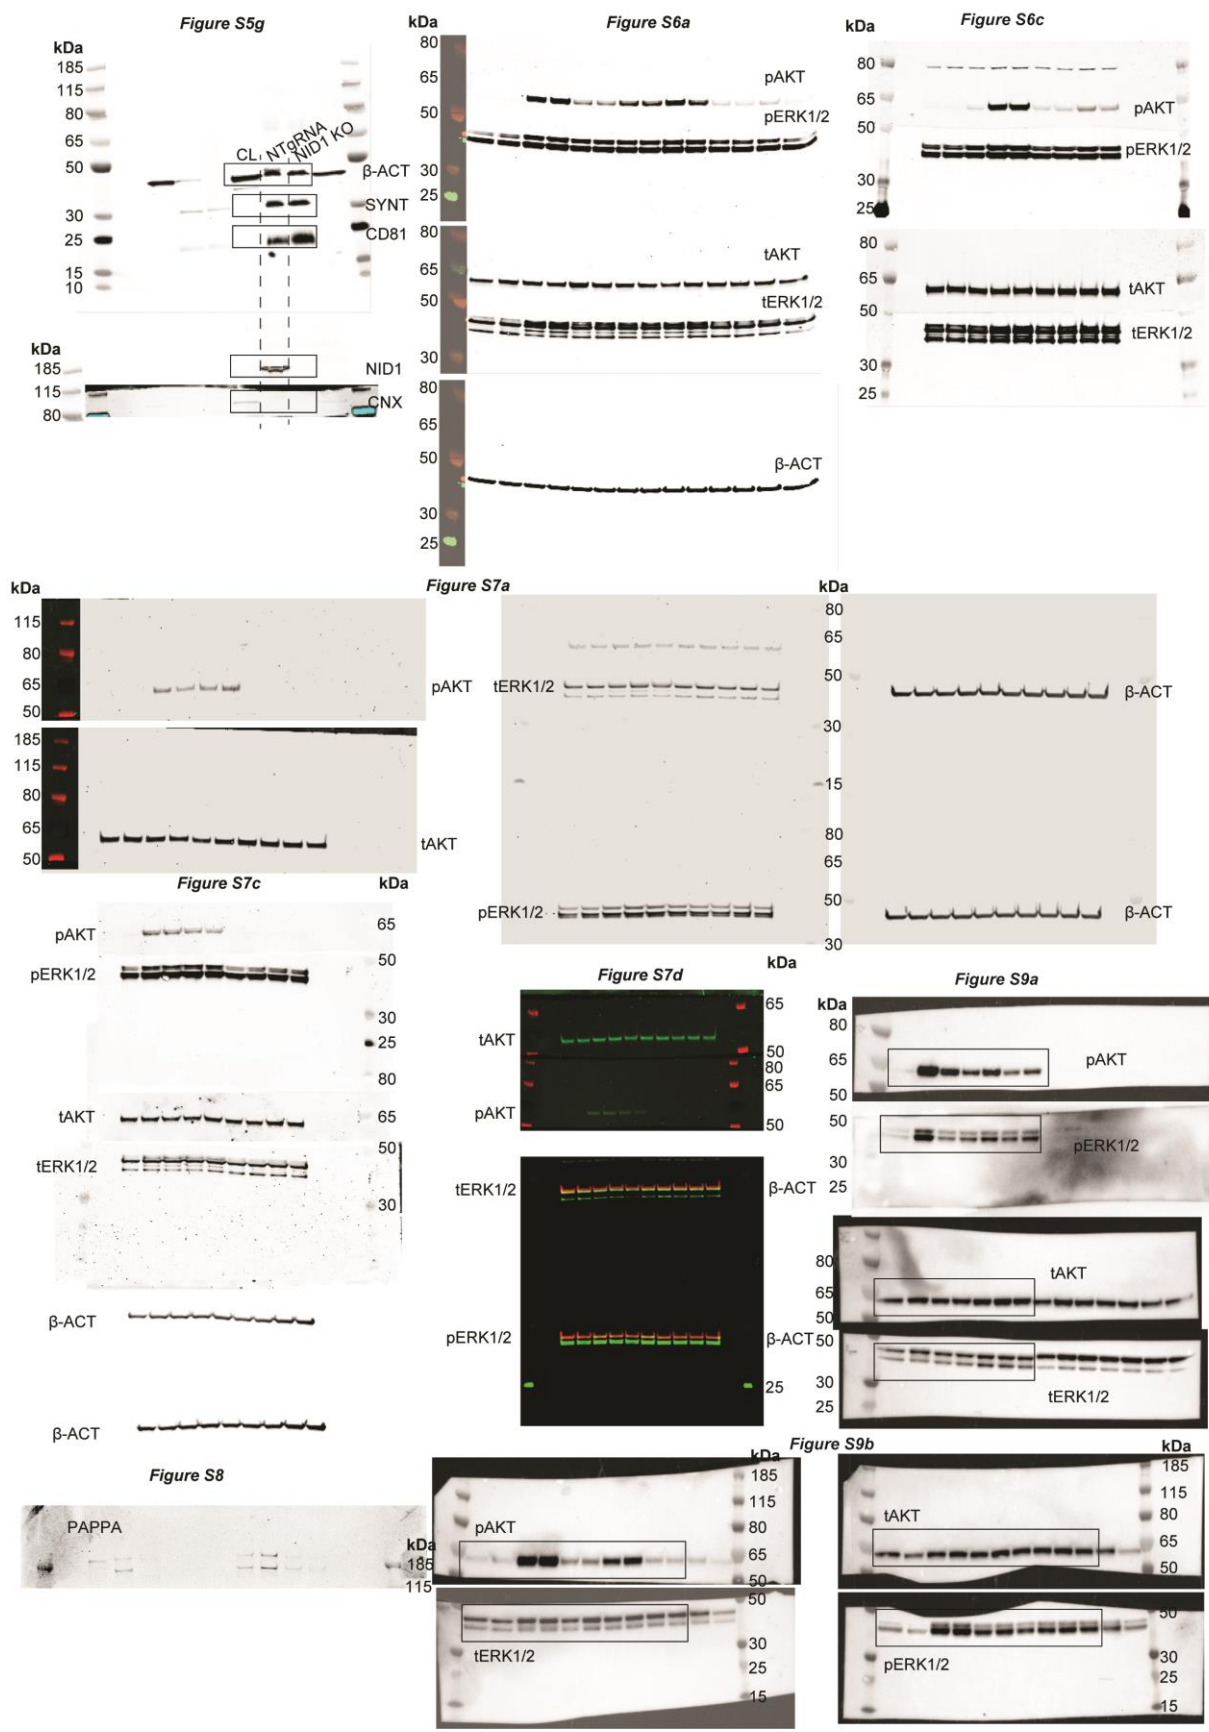

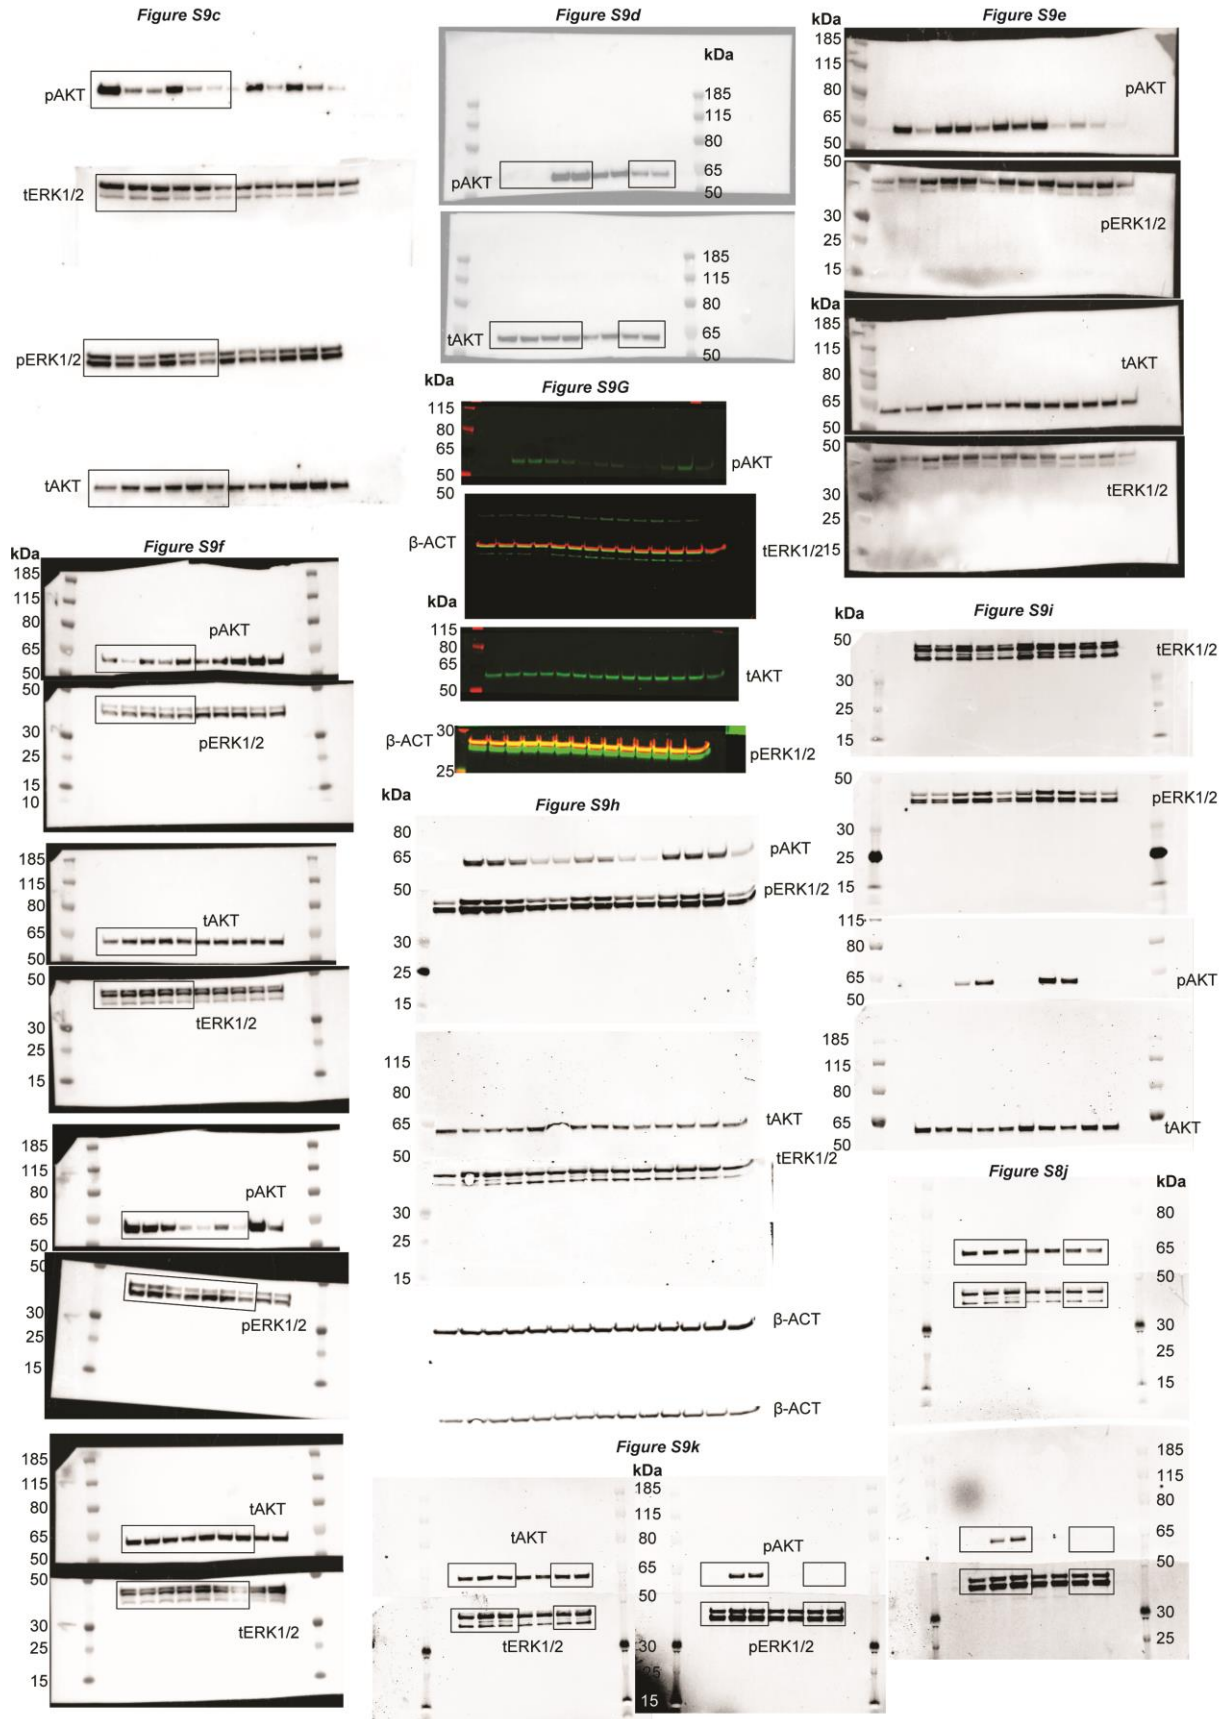



**Supplementary Figure 10. Unedited western blots.** Unedited western blots of *Figure 1b, 1e, 2c, 2e* (=overlay of protein blots with markers); *Figure 2g, 4c, 4d, 8b, 8e, 5c, 8g, 6b, 6d, 7a, 7b, S1c, S1d, S1f, S3c, S5g, S6a, S6c, S7a, S7c, S7d, S9a-S9k*. Blots are displayed with marker and with the selected area with specific proteins.
