# Supplementary material for: Cardiac progenitor cell-derived extracellular vesicles promote angiogenesis through both associated- and co-isolated proteins
Source: PubMed Central journal article supplement (PMC10393955; doi:10.1038/s42003-023-05165-7), 2023-08-01
Supplement: 42003_2023_5165_MOESM2_ESM.pdf [file 42003_2023_5165_MOESM2_ESM.pdf]

## Description of Additional Supplementary Files

**File name:** Supplementary Data 1

**Description:** Proteomics data are deposited in PRIDE Graph data are present in Supplementary Data file
